# Supplementary material
Source: PubMed Central journal article supplement (PMC4546861)
Supplement: NIHMS671613-supplement-3.pdf [file NIHMS671613-supplement-3.pdf]

## SUPPLEMENTARY MATERIAL

### SUBJECTS AND METHODS

#### **Study design**

The study was a prospective, randomized controlled, feasibility trial of an 8-week diet counseling intervention for veterans enrolled in the MOVE! program with continued assessment to week 24, between November 2012 to March 2014. The MOVE! program is an 8-week, evidence-based weight management program for overweight and obese veterans that is established in all Veterans Administration hospitals.<sup>29</sup> The study took place through Veterans Administration of San Diego Healthcare System (VASDHS) and its community clinics. This study received IRB approval (protocol # H130174). It was also registered with ClinicalTrials.gov (NCT01859403). All authors had access to the study data and had reviewed and approved the final manuscript.

#### **Participants**

Veterans with a physician's referral to weight management clinic and a BMI  $\geq$  30.0 were recruited from those enrolled in the VASDHS MOVE! program. Inclusion criteria for this study were willingness to purchase and consume two Healthy Choice meals per day, keep a food log, have no known food allergies, have access to a freezer and microwave, understand and consent to the study, and attend the MOVE! program during the initial 8 weeks. Subjects were excluded if they drank 6 or more caffeinated beverages per day; had an active substance abuse or dependence disorder within the past year; had a surgical gastrointestinal procedure, with exception of distal appendectomy; had acute infections or use of antibiotic therapy; had a cognitive disorder or psychiatric hospitalization in the past 6 months, or suicidal ideation

identified in the past year;  $\leq$ GFR of 30 ml/min; New York Heart Association functional classification of congestive heart failure above class I; edema requiring diuretics (not including hydrochlorothiazide); abnormal EKG reading, high dose oral corticosteroids; abnormal TSH, sodium or potassium concentrations; fasting LDLs  $>$  190 mg/dL; triglycerides  $\geq$  1000 mg/dL; or hemoglobin  $\leq$  10 g/dL. All participants provided written informed consent.

### **Diet Assignment**

Participants entered the study on their normal diet. The baseline visit was 3-4 weeks prior to start of MOVE! program initiation. After baseline measurements were taken, participants provided saliva for genetic analysis (Pathway Genomics, Inc., San Diego, CA; Figure S1). Participants were then randomly assigned to either the genetics-guided therapy (GT) group or standard therapy (ST) groups. Randomization, which was performed prior to receipt of nutrigenetic report, was non-stratified, two-group, concealed allocation, using the Research Randomizer website.<sup>30</sup>

In the GT group, participants and researchers were unblinded to the diet match and participants were informed of their nutrigenetic report. GT participants were matched to one of four possible diet types: balanced, low-carbohydrate, low-fat, or Mediterranean based on their report. They received a meal plan, lists of foods to incorporate in the plan, and samples of menus (similar to the MOVE! packet of literature given to ST group) to assist adherence to their diet and to obtain their caloric goal (**Online Material: Meal Plan**). The macronutrient guidelines of the different diets for the GT participants are shown in **Table S2**.

In the ST group, participants and researchers were blinded to the nutrigenetic report. These participants were given the balanced diet plan. To aid in simplicity and adherence, all diet

plans (for both ST and GT participants) incorporated Healthy Choice (ConAgra Foods®, Inc.) entrees at lunch and dinner (**Online Material: Sample Menu**) for the first 8 weeks of the study, for which participants were fully reimbursed upon delivery of receipts. At the conclusion of the study, ST participants were provided their nutrigenetic reports.

The macronutrient composition of each diet plan was based on a compilation of research studies that showed the benefit of that particular diet plan on patients with a high risk polymorphism. For example, the macronutrient composition of the Mediterranean diet plan was based on refs 17-19 and 20-22 (see **Table S1**). All participants were provided access to a website to track their diet and exercise (fatsecret.com). This website also displayed detailed macronutrient data to enable the study dietitian to track dietary adherence and provide individualized counseling to participants at weekly group visits. To ensure macro- and micro-nutrients were within USDA guidelines and fit each diet's macronutrient requirements, all diet plans were analyzed with The Food Processor ® version 10.12 (ESHA Research, Salem, OR).

During weeks 1-8, all participants received weekly face-to-face group counseling based on their diet match. During weeks 9-24 participants were asked to continue to report dietary intake into the food log. To encourage use of the diet tracking website, participants were paid one dollar per day of entry, which was tallied weekly and paid in one lump sum at week 24. No further formal dietary counseling was given during this time.

In the first 8 weeks of the study, macronutrient composition was assessed by food diaries (via website as described in methods) and weekly in-person counseling and review of diet. Macronutrient data was reviewed with every patient during these in-person visits. During weeks 9-24 participants were reimbursed for use of self-reported dietary intake food logs. However,

besides receipts from Healthy Choice Meals, we did not have any additional evidence that patients were compliant with the self-reported diets in their food logs.

### **Anthropometric, Energy, and Impedance Assessments**

At baseline, week 8, and week 24 each participant underwent measurements of height, weight, calculated BMI, waist circumference, hip circumference, and had a physical exam. Body weight was measured to the nearest 0.1 kg via a Weight-Tronix Scale (Scale Electronics Development, New York, NY, USA) by trained nursing staff. Resting metabolic rate (RMR) was collected using an indirect calorimeter system (MedGem®; Microlife Medical Home Solutions, Inc., Golden, CO, USA) to calculate each participant's daily caloric requirement. Bioelectrical impedance analysis (BIA) measurements was acquired using the Tanita® leg-to-leg system (model TBF – 300A; Arlington Heights, IL; USA) at baseline, week 8, and week 24. An EKG was performed to evaluate for bradycardia, rapid heart rate or other arrhythmia or active ischemia at the baseline visit.

### **Laboratory Measurements**

Fasting blood samples were collected at baseline, week 8, and week 24. A CBC, basic chemistry panel, 25-hydroxy vitamin D, thyroid stimulating hormone, alanine transaminase, lipid panel, ultra-sensitive C reactive protein (US-CRP) and insulin were drawn. Individual lab values that were 2.5 standard deviations from the mean were considered erroneous and were not included in further analysis. Fasting homeostatic model assessment of insulin resistance (HOMA-IR) was calculated based on fasting serum glucose and insulin concentrations.

### **Salivary Nutrigenomics Testing**

Salivary samples from participants were sent to Pathway Genomics and the Pathway Fit Test® (a genomic array) was performed. Based on the SNP alleles for seven genes, and using a proprietary algorithm, Pathway Fit Test® makes a recommendation to a specific diet (**Figure S1**). The genes (and reference SNP [rs] number) used to make these dietary recommendations were APOA2 (rs5082), ADIPOQ (rs17300539), FTO (rs9939609), KCTD10 (rs10850219), LIPC (rs1800588), MMAB (rs2241201), and PPARG (rs1801282); (**Table S1**).

## **Statistics**

The primary, pre-specified study goal was to compare the percentage of participants achieving  $\geq 5\%$  weight loss in the GT vs. ST groups at 8 weeks. This is mainly because a patient's success in the MOVE! program is assessed at the end of their 8 week enrollment. However, since most of those studying obesity are concerned with long-term outcomes of an intervention, the secondary outcome was the percentage of participants in each group achieving  $\geq 5\%$  weight loss at 24 weeks.

Given paucity of data, a pre-specified power and sample size analysis was not done. Since the aim was to understand the direction and magnitude of differences in GT vs. ST, 50 participants were recruited in this single site recruitment structure. Participants were recruited in batches prior to starting the MOVE! program. This trial was completed due to meeting enrollment goal of at least 50 participants. Based on a 25 participants per group assumption, this study had the ability to detect a 30% absolute difference in the proportion of individuals achieving  $\geq 5\%$  weight loss 24 weeks after randomization, assuming 80% power, and a two-sided alpha of 0.05. For this calculation, it was assumed that the control group rate would be similar to previous publications on MOVE! program (~18% success rate [28]).

Since this was a feasibility study, per protocol analyses for all participants was performed (**Figure 1**). Analyses were performed using the Statistical Package for Social Science (SPSS) version 20.0 (SPSS, Inc., Chicago, IL) and GraphPad Prism 5 (GraphPad Software, La Jolla, CA). A two-sided alpha of 0.05 was used for declaring statistical significance. Differences in means were evaluated utilizing student t-tests when comparing two primary groups, or a one-way analysis of variance (ANOVA), if comparing multiple subclasses, with Dunns multiple comparison post-hoc test. For comparisons of categorical variables, Fisher Exact test was used. The Wilson procedure with a correction for continuity was used to assess the confidence interval for the difference between two independent proportions. For adherence data, a Pearson's correlation was performed. In order to assess whether this genotype is a good prognosticator of weight loss from dietary/behavioral intervention, the sensitivity, specificity, positive predictive value, and negative predictive value were calculated for different weight loss thresholds. The threshold with the best results is reported but other thresholds are shown in the supplementary table (**Table S3**).

Table S1: Nutrigenetic genes used for dietary recommendations.

| Gene                                              | Symbol/SNP                   | Polymorphism                                 | Dietary Response      | Reference |
|---------------------------------------------------|------------------------------|----------------------------------------------|-----------------------|-----------|
| Adiponectin                                       | Adipoq<br>(rs17300539)       | G/G – insulin resistance, metabolic syndrome | Mediterranean diet    | 17-19     |
| Apolipoprotein A-II                               | ApoA2<br>(rs5082)            | C/C – higher BMI                             | Low fat diet          | 15, 16    |
| Fat mass and obesity-associated protein           | FTO<br>(rs9939609)           | A/A – higher BMI                             | Mediterranean diet    | 20-22     |
| K channel tetramerization domain containing 10    | KCTD10<br>(rs10850219)       | G/G – low HDL and high cholesterol           | Low carbohydrate diet | 23        |
| Hepatic triglyceride lipase                       | LipC<br>(rs1800588)          | T/T – low HDL and high cholesterol           | Low fat diet          | 24, 25    |
| Methylmalonic aciduria cblB type                  | MMAB<br>(rs2241201)          | G/G – high LDL                               | Low carbohydrate diet | 23        |
| Peroxisome proliferative activated receptor gamma | PPAR $\gamma$<br>(rs1801282) | C/C – high LDL, type 2 diabetes mellitus     | Low fat diet          | 26, 27    |

Note: Polymorphism column shows the variant that is associated with dysmetabolism and its associated trait. Dietary response column shows the diet that improved dysmetabolism in those with these variants in observational studies.

Table S2: Macronutrient Guidelines of the Different Diets Used in this Study.

|                       | Carbohydrates | Fats | Proteins |
|-----------------------|---------------|------|----------|
| Balanced Diet         | 55%           | 25%  | 20%      |
| Low Carbohydrate Diet | 40%           | 30%  | 30%      |
| Low Fat Diet          | 55-60%        | 20%  | 20-25%   |
| Mediterranean Diet    | 45%           | 35%  | 20%      |

Table S3: Estimates of Sensitivity, Specificity, Positive Predictive Value, and Negative Predictive Value of Using BDG as a Prognosticating test of weight loss at 6 months.

|                           | 0% Weight Loss | 1% Weight Loss | 2% Weight Loss | 3% Weight Loss | 4% Weight Loss | 5% Weight Loss | 6% Weight Loss |
|---------------------------|----------------|----------------|----------------|----------------|----------------|----------------|----------------|
| Sensitivity               | 38%            | 40%            | 43%            | 47%            | 56%            | 42%            | 33%            |
| Specificity               | 100%           | 100%           | 100%           | 100%           | 94%            | 75%            | 70%            |
| Positive Predictive Value | 100%           | 100%           | 100%           | 100%           | 90%            | 50%            | 30%            |
| Negative Predictive Value | 27%            | 32%            | 41%            | 50%            | 68%            | 68%            | 72%            |



## Supplemental Figures

Figure S1: Sample report from Pathway Genomics. Through a proprietary algorithm, Pathway Genomics makes a recommendation of the most appropriate diet for each participant (A) on the basis of their genotype for 6 genes (B). In this case, the participant is recommended to go on a low fat diet.

Figure S2: Lipid profile changes in the genotype guided therapy (GT) and the standard therapy (ST) groups. (A) Percentage LDL loss by participants at 8 and 24 weeks. Though this was significant at 8 weeks, it was no longer so at 24 weeks. Note that a negative number on this graph implies that LDL levels in serum went up. (B) Percentage HDL loss by participants at 8 and 24 weeks. (C) Triglycerides loss by participants at 8 and 24 weeks. (\*  $p < 0.05$ ).

Figure S3: Glucose homeostasis and Insulin resistance in the genotype guided therapy (GT) and the standard therapy (ST) groups. (A) Percentage decrease in fasting blood glucose by participants at 8 and 24 weeks. (B) HOMA-IR reduction from baseline by participants at 8 and 24 weeks. (C) Percentage decrease in glycated hemoglobin by participants at 8 and 24 weeks.

Figure S4: Adherence and weight loss by diet received. (A) There was no significant difference in adherence by diet received ( $p = 0.52$ , one-way ANOVA). (B) There was no significant difference in weight loss by diet received ( $p = 0.52$ , one-way ANOVA). Please note that in this graph, diet received refers to the dietary intervention the patient received, NOT their genotype.

Figure S1

A

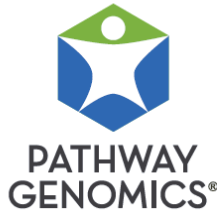

PATHWAY FIT®

Protected Health Information

PERSONAL DETAILS

PATIENT ID .....  
 DOB .....  
 GENDER .....  
 ETHNICITY .....

ORDERING HEALTHCARE

PROFESSIONAL  
 Amir Zarrinpar M.D., Ph.D  
 3350 La Jolla Village Drive  
 (1116)  
 San Diego, CA 92161 US

TEST METHODOLOGY

Genotyping by array-based evaluation of multiple molecular probes

LABORATORY INFO

ACCESSION NUMBER D5615507  
 ACTIVATION CODE .....  
 SPECIMEN TYPE .....  
 COLLECTED DATE .....  
 REPORT DATE Aug 23, 2013  
 RECEIVED DATE Aug 12, 2013

Test Results Reviewed & Approved by:  
 Laboratory Director,  
 Joseph Voland M.D.

Diet Recommendation

MATCHING DIET TYPE

- BALANCED DIET
- MEDITERRANEAN DIET
- LOW CARB DIET
- LOW FAT DIET

Genes Tested - ADIPOQ, APOA2, FTO, KCTD10, LIPC, MMAB, PPARG

Description

This patient has an increased likelihood of weight loss or health benefits on a diet that is lower in fats, especially saturated fats. This diet has been selected by evaluating many genetic variants associated with LDL, HDL, triglyceride, and blood sugar levels, as well as how people respond to different macronutrients.

B

MATCHING DIET TYPE

| GENE/LOCUS | MARKER     | GENOTYPE | STRENGTH |
|------------|------------|----------|----------|
| ADIPOQ     | rs17300539 | G/G      | ■ ■ ■ □  |
| APOA2      | rs5082     | C/C      | ■ ■ ■ ■  |
| FTO        | rs9939609  | T/T      | ■ ■ ■ □  |
| KCTD10     | rs10850219 | G/G      | ■ ■ ■ □  |
| LIPC       | rs1800588  | C/C      | ■ ■ ■ □  |
| MMAB       | rs2241201  | G/C      | ■ ■ ■ □  |
| PPARG      | rs1801282  | C/C      | ■ ■ ■ □  |

**Figure S2**

**A**

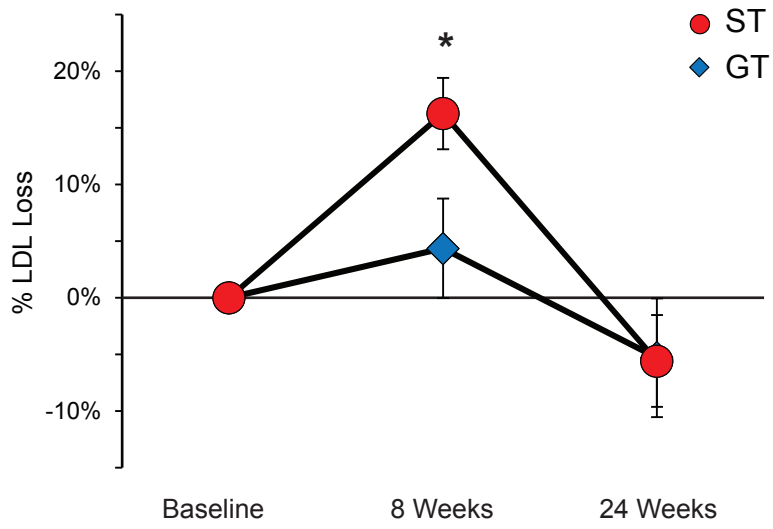

**B**

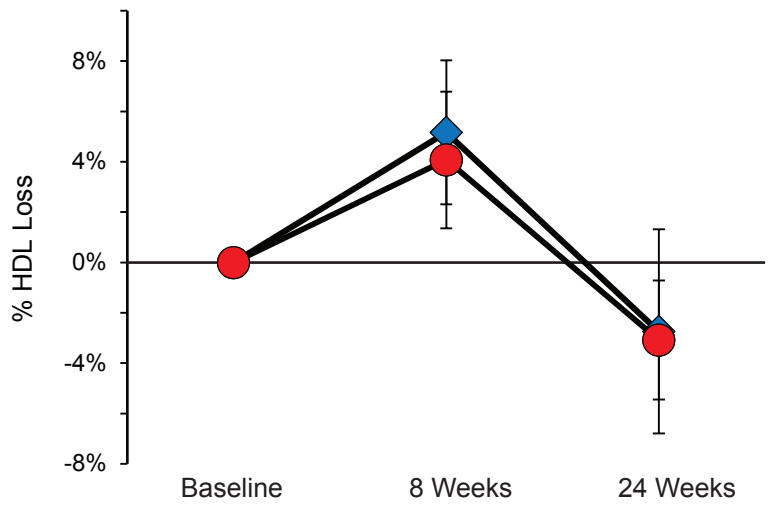

**C**

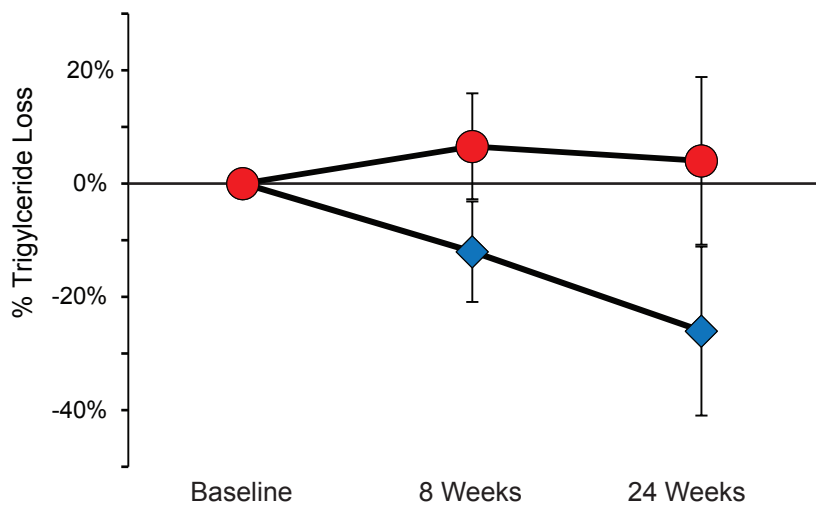

**Figure S3**

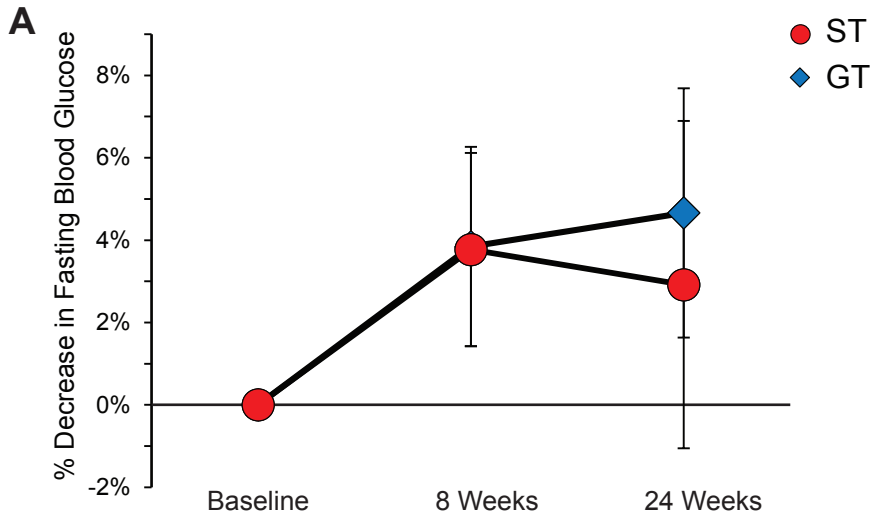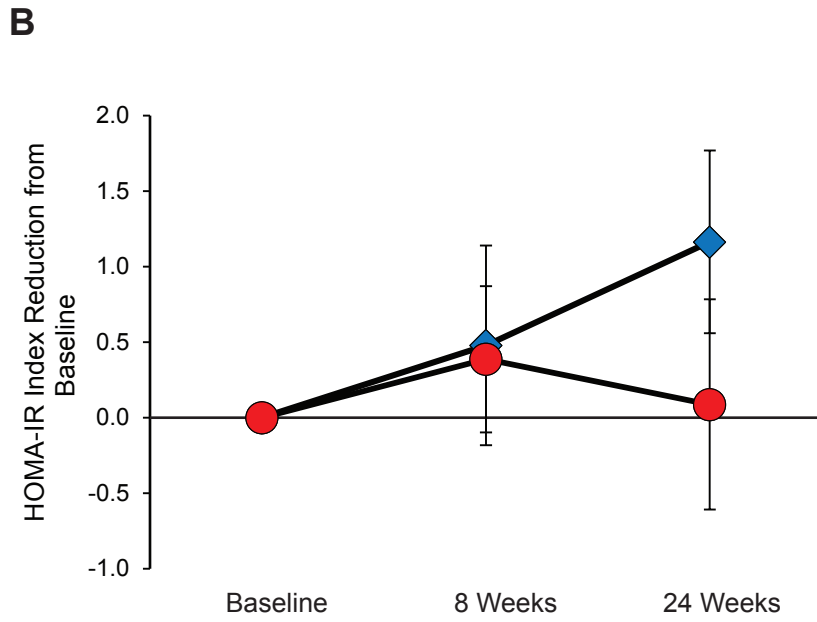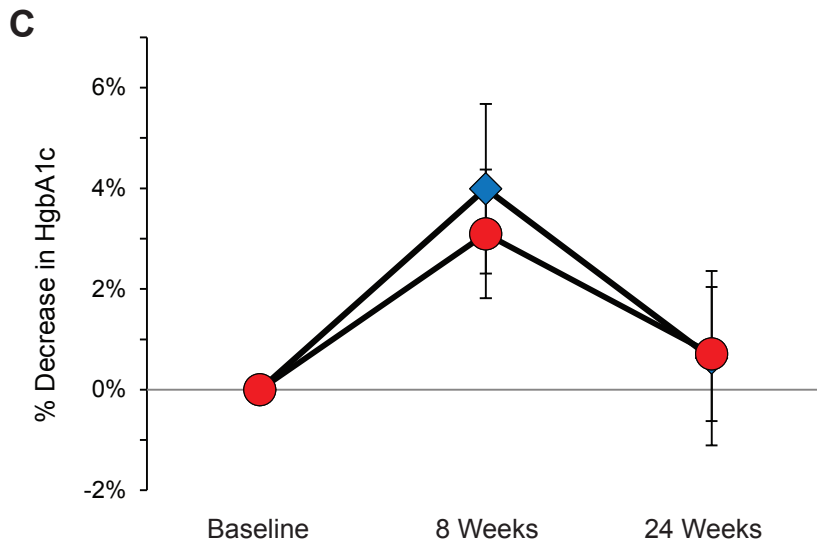

**Figure S4**

**A**

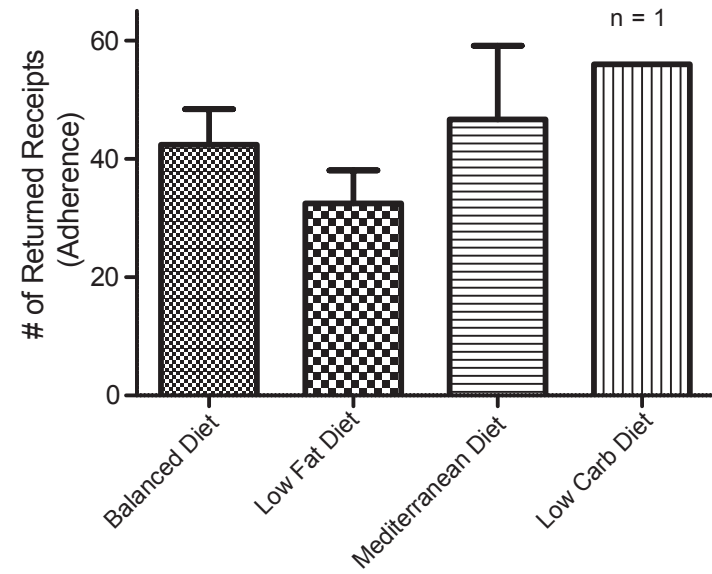

**B**

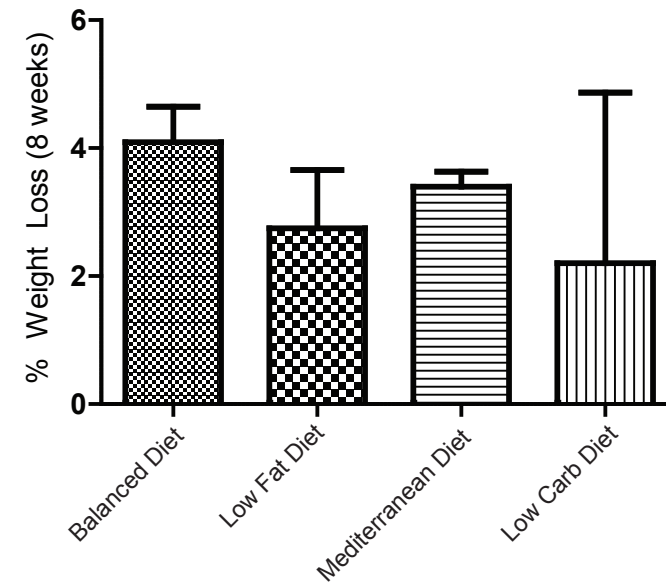

**Diet Received**

**Balanced Diet Meal Plan**  
**Nutrient Percentage Breakdown: 25% fat 55% carbohydrate 20% protein**

**Sample Breakfast Options**  
*(Pick one entrée for breakfast)*

| Option Code | <i>Entrées</i>                                                                                                                                                                                                                                                                   |
|-------------|----------------------------------------------------------------------------------------------------------------------------------------------------------------------------------------------------------------------------------------------------------------------------------|
| B1          | <p><b><u>Bran flakes</u></b></p> <ul style="list-style-type: none"> <li>● ¾ cup Bran flakes topped with</li> <li>● ½ banana in</li> <li>● 1 cup skim milk</li> </ul>                                                                                                             |
| B2          | <p><b><u>Waffle topped with berries</u></b></p> <ul style="list-style-type: none"> <li>● 2 whole grain waffle with</li> <li>● 2 tbsp sugar-free syrup and</li> <li>● ½ cup fresh/frozen berries</li> </ul>                                                                       |
| B3          | <p><b><u>Yogurt topped with strawberries</u></b></p> <ul style="list-style-type: none"> <li>● 1 cup fat-free yogurt with</li> <li>● ½ cup strawberries</li> <li>● 1 hardboiled egg</li> </ul>                                                                                    |
| B4          | <p><b><u>Egg white scramble</u></b></p> <ul style="list-style-type: none"> <li>● 4 egg whites scrambled with</li> <li>● ½ cup sautéed fresh spinach in</li> <li>● ½ tbsp olive oil</li> <li>● 2 slices of whole grain toast</li> <li>● 2 slice whole grain toast</li> </ul>      |
| B5          | <p><b><u>Cottage cheese with melon</u></b></p> <ul style="list-style-type: none"> <li>● 1 cup low fat (2%) cottage cheese with</li> <li>● ½ cup cubed melon</li> <li>● 1 multigrain English muffin</li> </ul>                                                                    |
| B6          | <p><b><u>Ham, egg, cheese scramble</u></b></p> <ul style="list-style-type: none"> <li>● 1 oz reduced fat ham and</li> <li>● 4 egg white and</li> <li>● 1 slice (1oz) cheese scramble in 1<br/>tbsp skim milk</li> <li>● 1 banana</li> <li>● 1 slice whole grain toast</li> </ul> |
| B7          | <p><b><u>Oatmeal</u></b></p> <ul style="list-style-type: none"> <li>● 1 cup cooked regular/quick/ instant oatmeal</li> <li>● 1/8 cup natural granola</li> <li>● 1 large egg, scrambled with</li> <li>● 1 tbsp skim milk</li> <li>●</li> </ul>                                    |
|             |                                                                                                                                                                                                                                                                                  |

### Sample Lunch/Dinner Healthy Choice Meals

*Pick one entrée for lunch and one for dinner and supplement with 1 additional serving of lean protein and 1 additional serving of vegetable.*

| Option Code | Healthy Choice Entrees              | Calories* |
|-------------|-------------------------------------|-----------|
| M1          | Rosemary Chicken and Sweet Potatoes | 180       |
| M2          | Chicken Romano Fresca               | 230       |
| M3          | Portabella Parmesan Risotto         | 220       |
| M4          | Honey Balsamic Chicken              | 220       |
| M5          | Lemon Herb Shrimp                   | 200       |
| M6          | Sesame Glazed Chicken               | 330       |
| M7          | Roasted Chicken Verde               | 230       |
| M8          | Sundried Tomato Chicken             | 320       |
| M9          | Salisbury Steak                     | 170       |
| M10         | Slow Roasted Turkey Medallions      | 210       |
| M11         | Bacon and Smokey Cheddar Chicken    | 250       |
| M12         | Chicken Alfredo Florentine          | 210       |
| M13         | Ravioli Florentine Marinara         | 230       |
| M14         | Honey Ginger Chicken                | 320       |
| M15         | Spicy Caribbean Chicken             | 300       |
| M16         | Garlic Herb Shrimp                  | 260       |
| M17         | Pineapple Chicken                   | 380       |

## Lean Protein

*Please eat 1 additional serving with lunch and dinner.*

| Option Code | Protein                                            |
|-------------|----------------------------------------------------|
| P1          | 2 hardboiled eggs                                  |
| P2          | 1 oz low sodium beef/turkey/duck/ostrich jerky     |
| P3          | 1 (1.5 oz) bake chicken drumstick with skin        |
| P4          | ½ (3.5 oz) baked chicken breast with skin          |
| P5          | 2 oz baked chicken thigh with skin                 |
| P6          | 1 (3.2 oz) baked chicken wing (with skin)          |
| P7          | 3 oz baked/broiled salmon                          |
| P8          | 3 oz baked/broiled catfish                         |
| P9          | 3 oz baked/broiled tilapia                         |
| P10         | 3 oz baked/broiled halibut                         |
| P11         | 3 oz baked/broiled cod                             |
| P12         | 3 oz broiled lean beef (sirloin, tenderloin)       |
| P13         | 3 oz broiled New York steak, top loin, strip steak |
| P14         | 3 oz (2 thin slices or 1 thick slice) roast beef   |
| P15         | 3 oz broiled pork loin                             |
| P16         | 2 oz slice of turkey deli meat                     |
| P17         | 3 oz canned tuna in water                          |
| P18         | 1 cup black beans                                  |
| P19         | 1 cup pinto/kidney beans                           |
| P20         | ¼ cup roasted almonds (unsalted)                   |



### Vegetable Samples

*Please eat 1-2 additional serving with lunch and dinner. (May also be used for snacking.)*

| Option Code | Vegetable                                                                                                                                                                                                                     | Calories* |
|-------------|-------------------------------------------------------------------------------------------------------------------------------------------------------------------------------------------------------------------------------|-----------|
| V1          | <p><b><u>Mixed green and tomato salad</u></b></p> <ul style="list-style-type: none"> <li>● ½ cup mixed green salad with</li> <li>● ½ cup fresh tomato,</li> <li>● 2 tbsp fat free French/Italian dressing</li> </ul>          | 80        |
| V2          | <p><b><u>Sautéed green beans</u></b></p> <ul style="list-style-type: none"> <li>● ½ cup boiled fresh/frozen green beans</li> </ul>                                                                                            | 35        |
| V3          | <p><b><u>Steamed broccoli</u></b></p> <ul style="list-style-type: none"> <li>● ½ cup steamed fresh/frozen broccoli</li> </ul>                                                                                                 | 30        |
| V4          | <p><b><u>Steamed mixed vegetables</u></b></p> <ul style="list-style-type: none"> <li>● ½ cup steamed fresh/frozen mixed vegetables</li> </ul>                                                                                 | 60        |
| V5          | <p><b><u>Spinach and mushroom salad</u></b></p> <ul style="list-style-type: none"> <li>● ¾ cup spinach salad topped with</li> <li>● ¼ cup chopped mushroom</li> <li>● 2 tbsp fat free balsamic vinaigrette</li> </ul>         | 70        |
| V6          | <p><b><u>Baby carrots</u></b></p> <ul style="list-style-type: none"> <li>● 10 fresh baby carrot sticks with</li> <li>● 1 tbsp fat free ranch dressing</li> </ul>                                                              | 45-75     |
| V7          | <p><b><u>Celery sticks</u></b></p> <ul style="list-style-type: none"> <li>● 1 large fresh stalk celery with</li> <li>● 1 tbsp fat free ranch dressing</li> </ul>                                                              | 30        |
| V8          | <p><b><u>Sautéed squash/zucchini</u></b></p> <ul style="list-style-type: none"> <li>● ½ cup baked squash/zucchini, lightly seasoned with herbs/pepper</li> </ul>                                                              | 20        |
| V9          | <p><b><u>Mixed green and mushroom salad</u></b></p> <ul style="list-style-type: none"> <li>● ¾ cup fresh mixed green salad with</li> <li>● ¼ cup chopped mushroom,</li> <li>● 2 tbsp fat free balsamic vinaigrette</li> </ul> | 75        |
| V10         | <p><b><u>Sautéed mustard greens</u></b></p> <p>1 cup fresh/frozen mustard greens boiled</p>                                                                                                                                   | 35        |
|             |                                                                                                                                                                                                                               |           |

## Snack Samples

### Fruit Samples

*(Servings per day depends on calories: will be discussed with dietitian)*

| Option Code | Fruit                               | Calories* |
|-------------|-------------------------------------|-----------|
| F1          | 1 small (4oz) apple                 | 55        |
| F2          | 1 small (6") banana                 | 90        |
| F3          | 1 small (4oz) peach                 | 45        |
| F4          | 1 small (5 oz) pear                 | 75        |
| F5          | 17 grapes                           | 50        |
| F6          | 1 cup cantaloupe                    | 55        |
| F7          | 1 cup melon                         | 60        |
| F8          | ½ cup canned peaches in water       | 40        |
| F9          | ½ cup canned fruit salad in water   | 35        |
| F10         | ½ cup canned pineapple in own juice | 75        |

### Dairy Samples

*(Servings per day depends on calories: will be discussed with dietitian)*

| Option Code | Dairy                                    | Calories* |
|-------------|------------------------------------------|-----------|
| D1          | 8 oz skim milk                           | 90        |
| D2          | 8 oz light soy milk, unsweetened         | 70        |
| D3          | 1 cup (6 oz) Greek-style yogurt          | 100       |
| D4          | ½ cup (4 oz) low fat (1%) cottage cheese | 80        |
| D5          | 1 string cheese (2% milk reduced fat)    | 70        |

**Dessert substitutes**

*(Eat only 1-2 times a week)*

| Option Code | Desserts                                                                           | Calories* |
|-------------|------------------------------------------------------------------------------------|-----------|
| S1          | Jell-O gelatin, sugar free, 1 snack cup (3.2 oz)<br>0 carbs, 0 fat                 | 10        |
| S2          | Jell-O chocolate pudding, sugar free, 1 snack cup (3.7 oz)<br>13g carbs, 1.5g fat  | 60        |
| S3          | Dole/Dreyer's frozen fruit bar (variety pack), fat free, 1 bar<br>12g carbs        | 50        |
| S4          | Ice cream sorbet ½ cup<br>28g carbs, 0.5g fat                                      | 130       |
| S5          | Quaker rice cakes, 2 piece<br>14g carbs, 0g fat                                    | 70        |
| S6          | Air popped popcorn, 2 cup<br>12.4g carbs, 0.8g fat                                 | 60        |
| S7          | Smart Ones giant fudge bars, 1 bar<br>20g carb, 0g fat                             | 80        |
| S8          | Popsicle fudgsicle bars, no sugar added, 1 bar<br>10g carbs, 1g fat                | 40        |
| S9          | Healthy Choice fudge bar, 1 bar<br>13g carbs, 1g fat                               | 80        |
| S10         | Snackwell's devil's food cookie cakes, fat free, 1 cookie<br>12g carbs, 0g fat     | 50        |
| S11         | Breyers chocolate cookies and cream, fat free ice cream, ½ cup<br>25g carb, 0g fat | 110       |
| S12         | Meringue cookies, 6 cookies<br>14g carbs, 0g fat                                   | 55        |
| S13         | Hood fat free frozen yogurt, ½ cup<br>20g carbs, 0g fat                            | 90        |

\*Caloric values determined by direct package labels. If not available, by The Food Processor ® version 10.12(ESHA Research, Salem, OR).

**Balanced Diet Sample Menu Plan: 1420 kcals**

|                  | <b>Ingredient</b>                             | <b>Quantity</b>               |
|------------------|-----------------------------------------------|-------------------------------|
| <b>Breakfast</b> | Bran flakes cereal                            | ¾ cup (30 g)                  |
|                  | Milk, 2%                                      | 1 cup (246 g)                 |
|                  | Banana, medium                                | ½ fruit (59 g)                |
| <b>Snack</b>     | Yogurt, flavored, low fat (1%)                | 8 oz (113 g)                  |
|                  | Canned pineapple in own juice                 | ½ cup (90 g)                  |
| <b>Lunch</b>     | Healthy Choice Lemon Herb Shrimp              | 1 entrée (247 g)              |
|                  | Broiled steak, top loin                       | 2 oz (56 g)                   |
|                  | G & M Salad                                   |                               |
|                  | fresh mixed greens with                       | 1 cup (36 g)                  |
|                  | chopped mushroom,<br>balsamic vinaigrette     | ½ cup (44 g)<br>2 Tbsp (30 g) |
| <b>Snack</b>     | String cheese, 2% milk (reduced fat)          | 1 piece (21 g)                |
|                  | Strawberries                                  | 1¼ cups (184 g)               |
| <b>Dinner</b>    | Healthy Choice Bacon & Smokey Cheddar Chicken | 1 entrée (245 g)              |
|                  | Black beans, cooked                           | ½ cup (127 g)                 |
|                  | Fresh asparagus, boiled, seasoned with herbs  | 6 spears (90 g)               |
|                  | Sorbet, chocolate                             | ½ cup (70 g)                  |
| <b>Dessert</b>   | Sorbet, chocolate                             | ½ cup (70g)                   |
